# Supplementary material for: A double-negative gene regulatory circuit underlies the virgin behavioral state
Source: PubMed Central journal article supplement — Cell Rep. Author manuscript; Available in PMC 2021 Aug 6. (PMC8344067; doi:10.1016/j.celrep.2021.109335), 2021-07-06
Supplement: NIHMS1722142-supplement-1.pdf [file NIHMS1722142-supplement-1.pdf]

**Cell Reports, Volume 36**

**Supplemental information**

**A double-negative gene regulatory circuit  
underlies the virgin behavioral state**

**Daniel L. Garaulet, Albertomaria Moro, and Eric C. Lai**

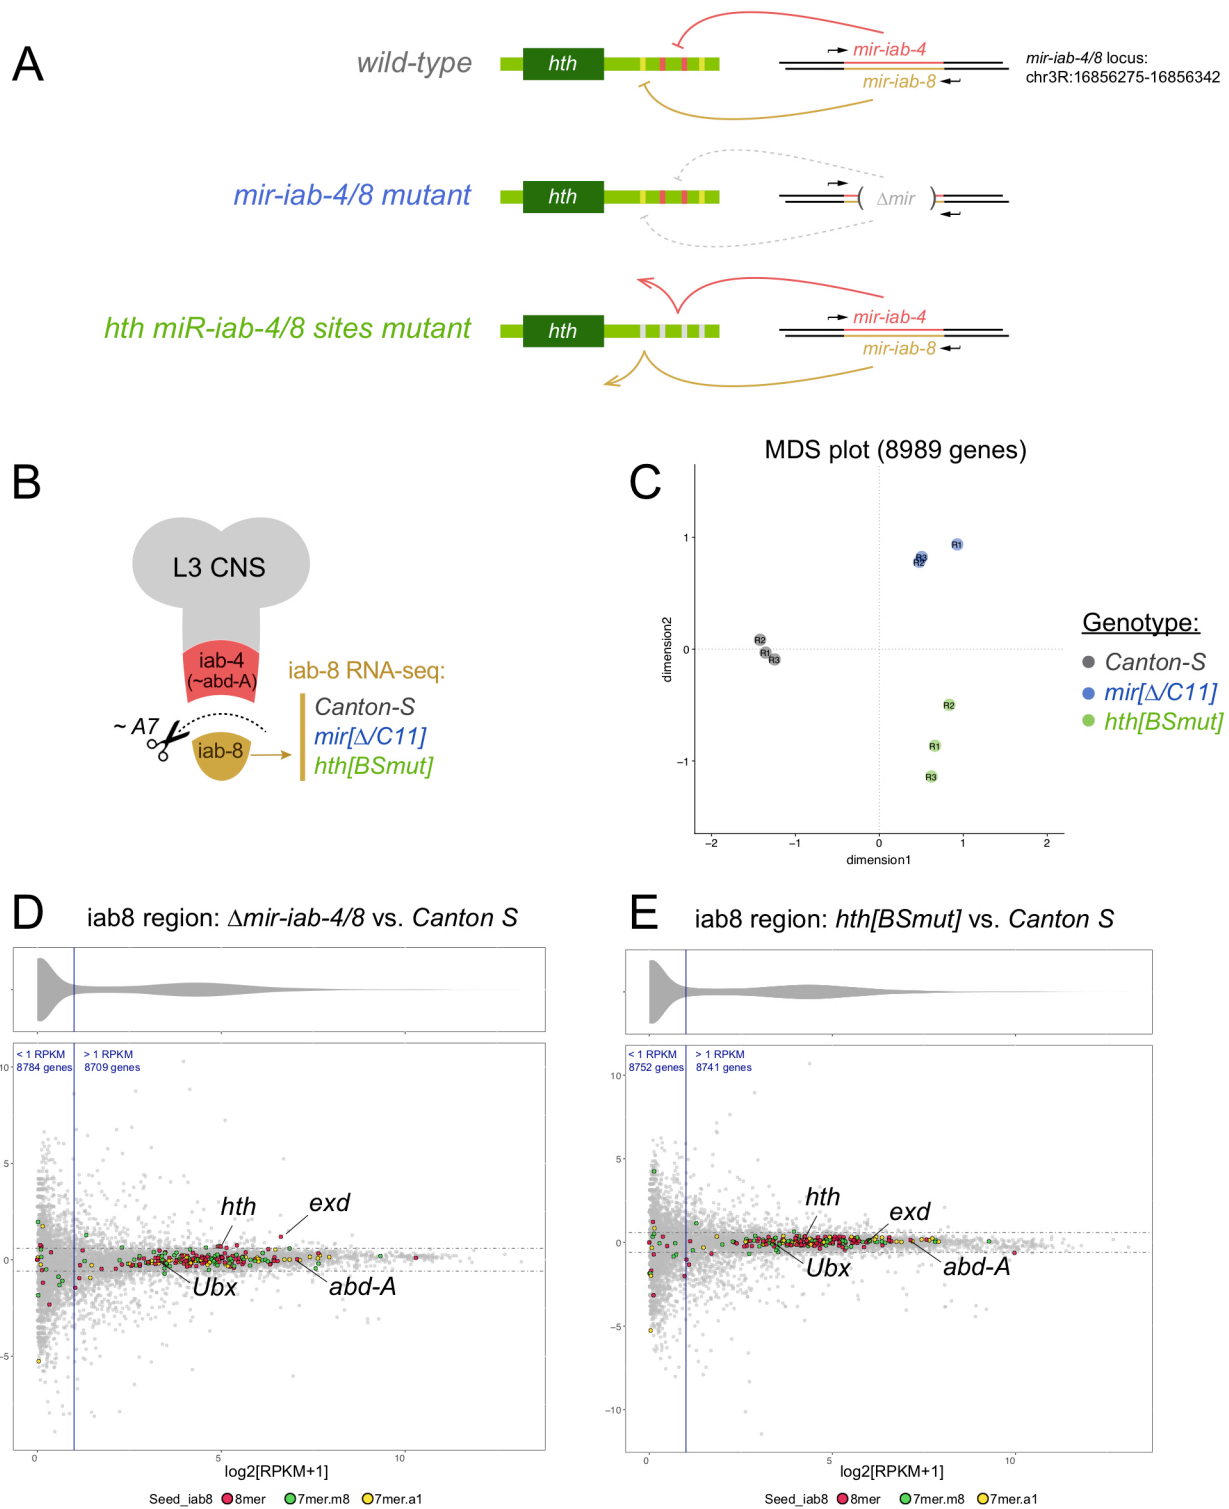

Supplementary Figure 1. Transcriptome analyses of the *iab-8* domain. Related to Figure 1.

(A) Cartoon illustrating *mir-iab-4/8* regulation of *hth* as well as the *mir-iab-4/8* and *hth* binding sites mutants used in this study. (B) Pattern of expression of miR-*iab-4* and miR-*iab-8* and strategy for manual dissection of the *iab-8* region of the larval ventral nerve cord (VNC), corresponding to the domain of *mir-iab-8* expression. Triplicate biological samples were isolated from *Canton-S*, trans-heterozygotes of *mir-iab-4/8* deletion (*mir*[ $\Delta C11$ ]), and the *hth*[BSmut] bearing mutations in all miR-*iab-4/8* binding sites in its 3' UTR. (C) MDS plot of the RNA-seq samples. (D) MA plot comparing  $\Delta mir-iab-4/8$  to *Canton-S* shows relatively subtle overall gene expression changes, with little changes to direct miR-*iab-8*-5p targets. Amongst previously characterized direct miR-*iab-8*-5p targets encoding homeobox genes, both TALE cofactors (*hth* and *exd*) were substantially upregulated. (E) MA plot comparing *hth*[BSmut] to *Canton-S* also shows relatively subtle overall gene expression changes. *hth* was reproducibly upregulated, although to a lesser extent than in  $\Delta mir-iab-4/8$ , but *exd* was unchanged.

Example genes upregulated  
in both  $\Delta mir-iab-4/8$  and  $hth[BSmut]$

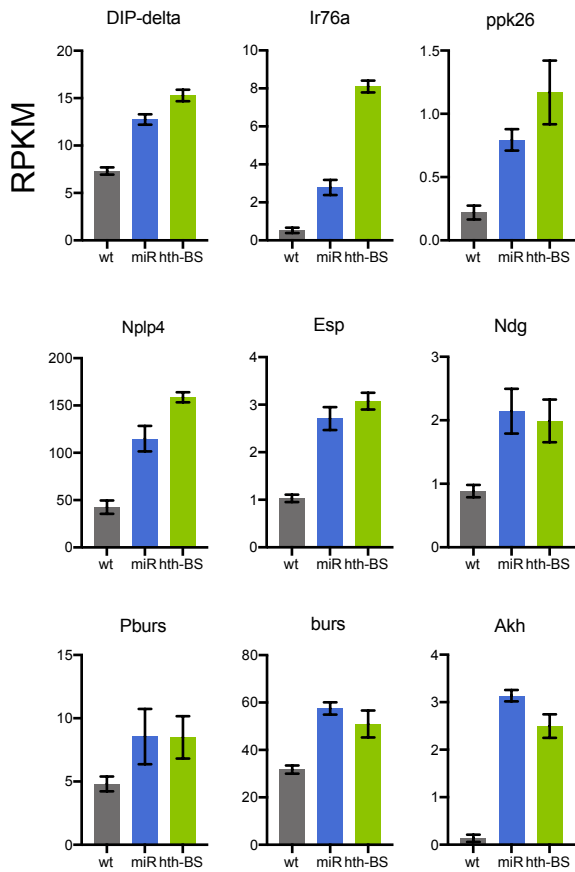

DIP-delta Neural  
 Ir76a Neural. Ionotropic receptor. Expressed in antennal sensory neurons  
 ppk26 Sodium channel family. Ppk neurons involved in switch  
 Nplp4 Neuropeptide like precursors, neuropeptide  
 Esp Involved in female remating receptivity behavior  
 Ndg Neural. Basal membrane and ECM. Involved in synaptic plasticity  
 Pburs Partner of Burst - Neural exclusive  
 Burs Neurohormone - not very neuron specific  
 Akh Adipokinetic hormone. High neural

Example genes downregulated  
in both  $\Delta mir-iab-4/8$  and  $hth[BSmut]$

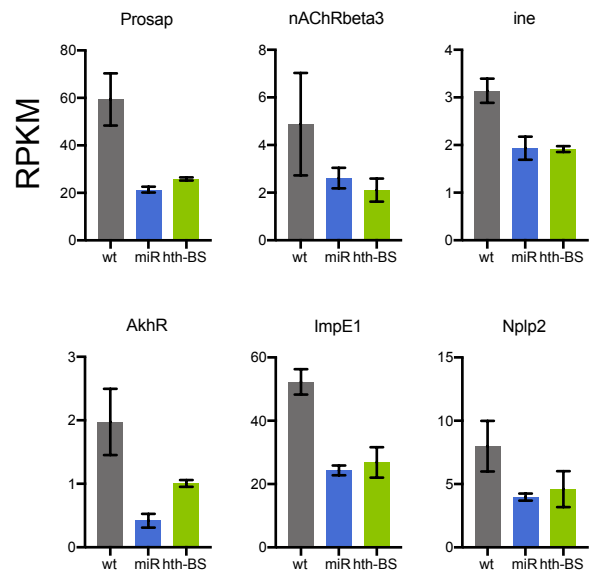

Prosap High in neurons. Synaptic growth, NMJ  
 nAChRbeta3 nicotinic Acetylcholine Receptor  
 ine High in CNS (mostly adults). SLC6A family of neurotransmitter transporters  
 AkhR protein-coupled receptor for the hormone encoded by Akh  
 Flo2 CNS-enriched scaffold protein, involved in wg and hh spreading  
 ImpE1 Ecdysone-inducible gene E1. CNS disc exclusive  
 Nplp2 Neuropeptide-like precursor 2. Neurohormone

Supplementary Figure 2. Selected genes that are co-regulated in  $\Delta mir-iab-4/8$  and  $hth[BSmut]$ . Related to Figure 2.

Shown are example loci that are coordinately upregulated or downregulated the  $iab-8$  region of  $\Delta mir-iab-4/8$  and  $hth[BSmut]$  VNC, compared to control *Canton-S*. Data are from the triplicate RNA-seq experiments.

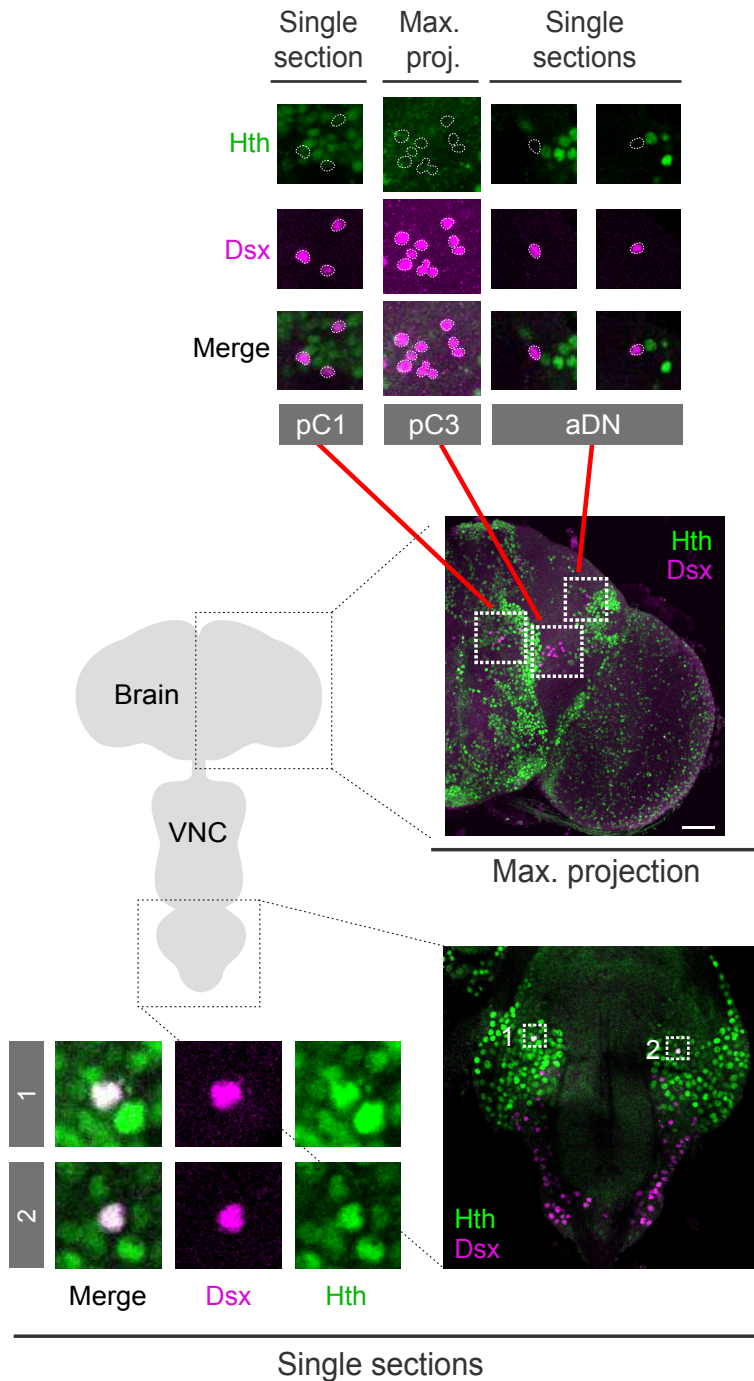

Supplementary Figure 3. Highly complementary expression of Hth and Dsx in the brain. Related to Figure 2.

Schematic of the *Drosophila* central nervous system (Center). Double labeling for Hth (green) and Dsx (purple) in the brain (upper half) and VNC (lower half). Maximum projection of the brain is shown, revealing broad expression of Hth and sparser accumulation of Dsx. aDN, pC3 and pC1 clusters are shown in higher magnification illustrating largely complementary accumulation of these nuclear markers, even in closely apposed cells. In the VNC, very few cells present strong colocalization of both proteins. Scalebar= 40  $\mu$ M.

# SAG-1 neurons (*VT-7068* $\cap$ *VT-50405*)

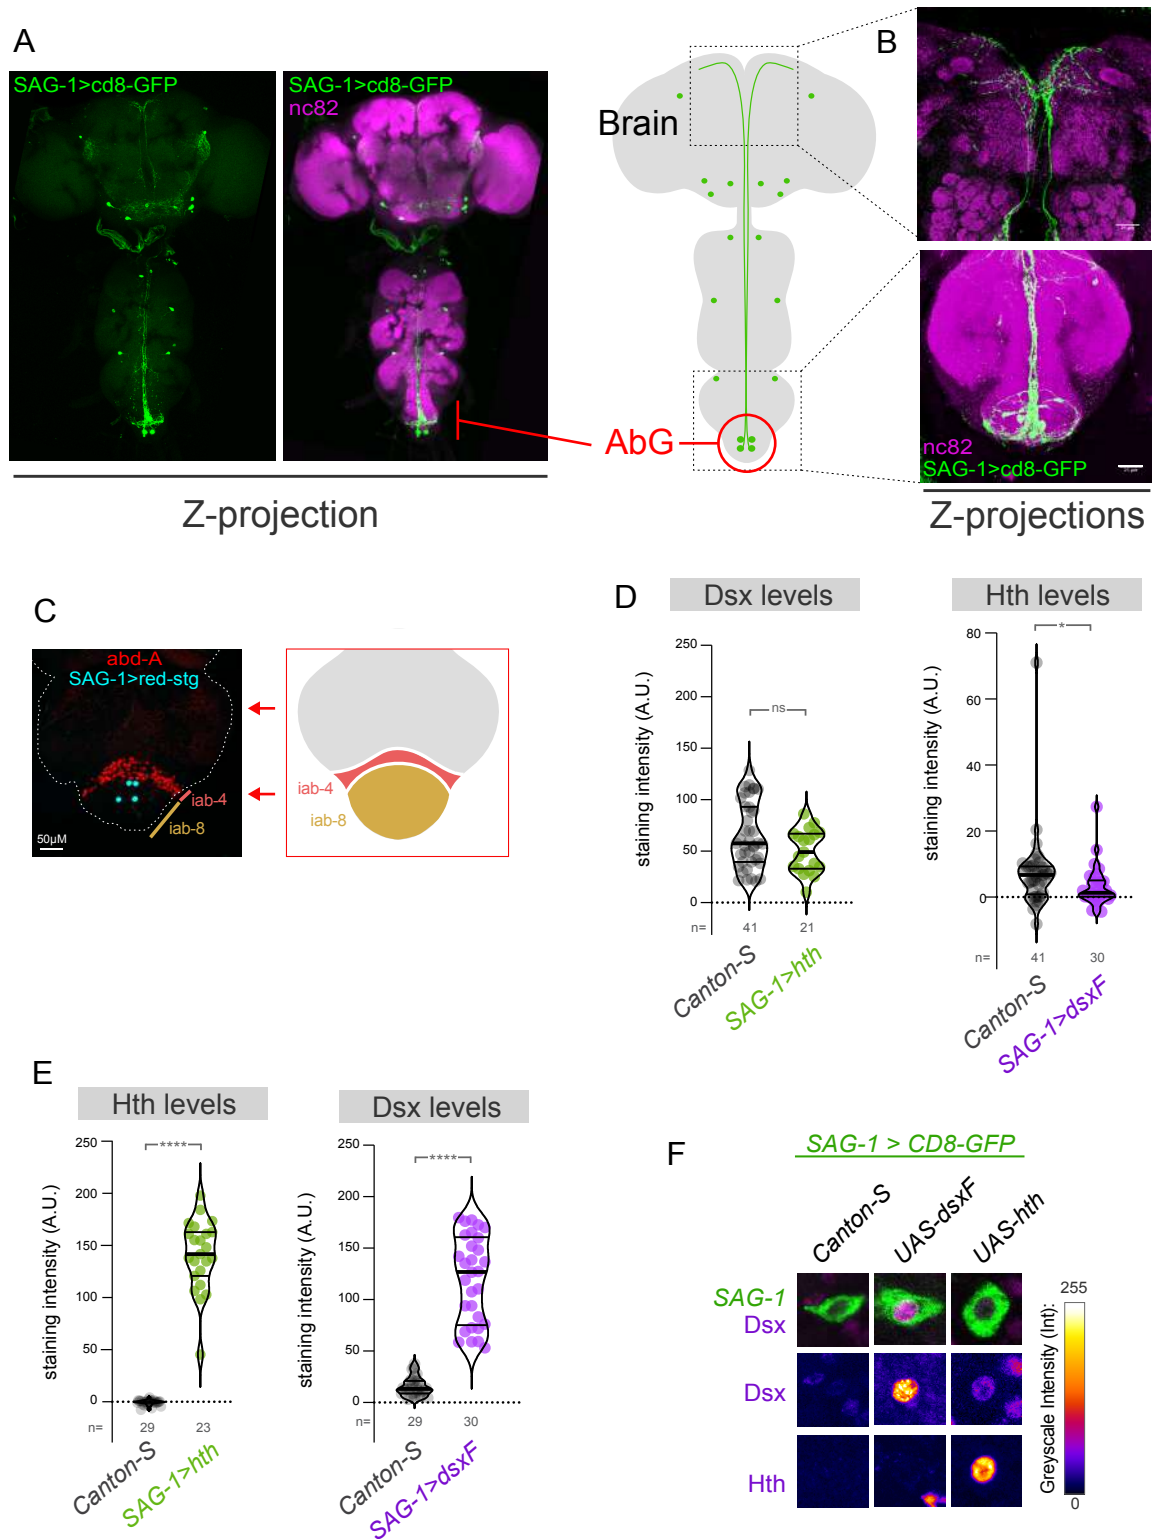

Supplementary Figure 4. Characterization of SAG-1 neurons in the VNC. Related to Figures 2 and 3.

(A) Images show the regulatory intersection of *VT-7068* and *VT-50405* using split-Gal4 lines, that defines a sparse pattern with typically four SAG-1 neurons within the abdominal ganglion (AbG). (B) These abdominal SAG-1 neurons project their axons to the central brain. (C) The somas of abdominal SAG-1 neurons, labeled here using nuclear Red-Stinger (red-stg, in cyan), reside in the *iab-8* domain of the AbG, posterior to *abd-A* expressing segments (in red). (D) Quantification of Dsx and Hth levels in the 4 abdominal SAG-1 of control flies, *SAG-1>UAS-hth*, and *SAG-1>UAS-dsxF* flies. (F) Images show representative images of the quantifications shown in D and E. Mann-Whitney non parametric test ns, not significant, \* $p < 0.05$ , \*\*\*\* $p < 0.0001$ . Error bars, SEM. Scalebars in 50  $\mu$ m.

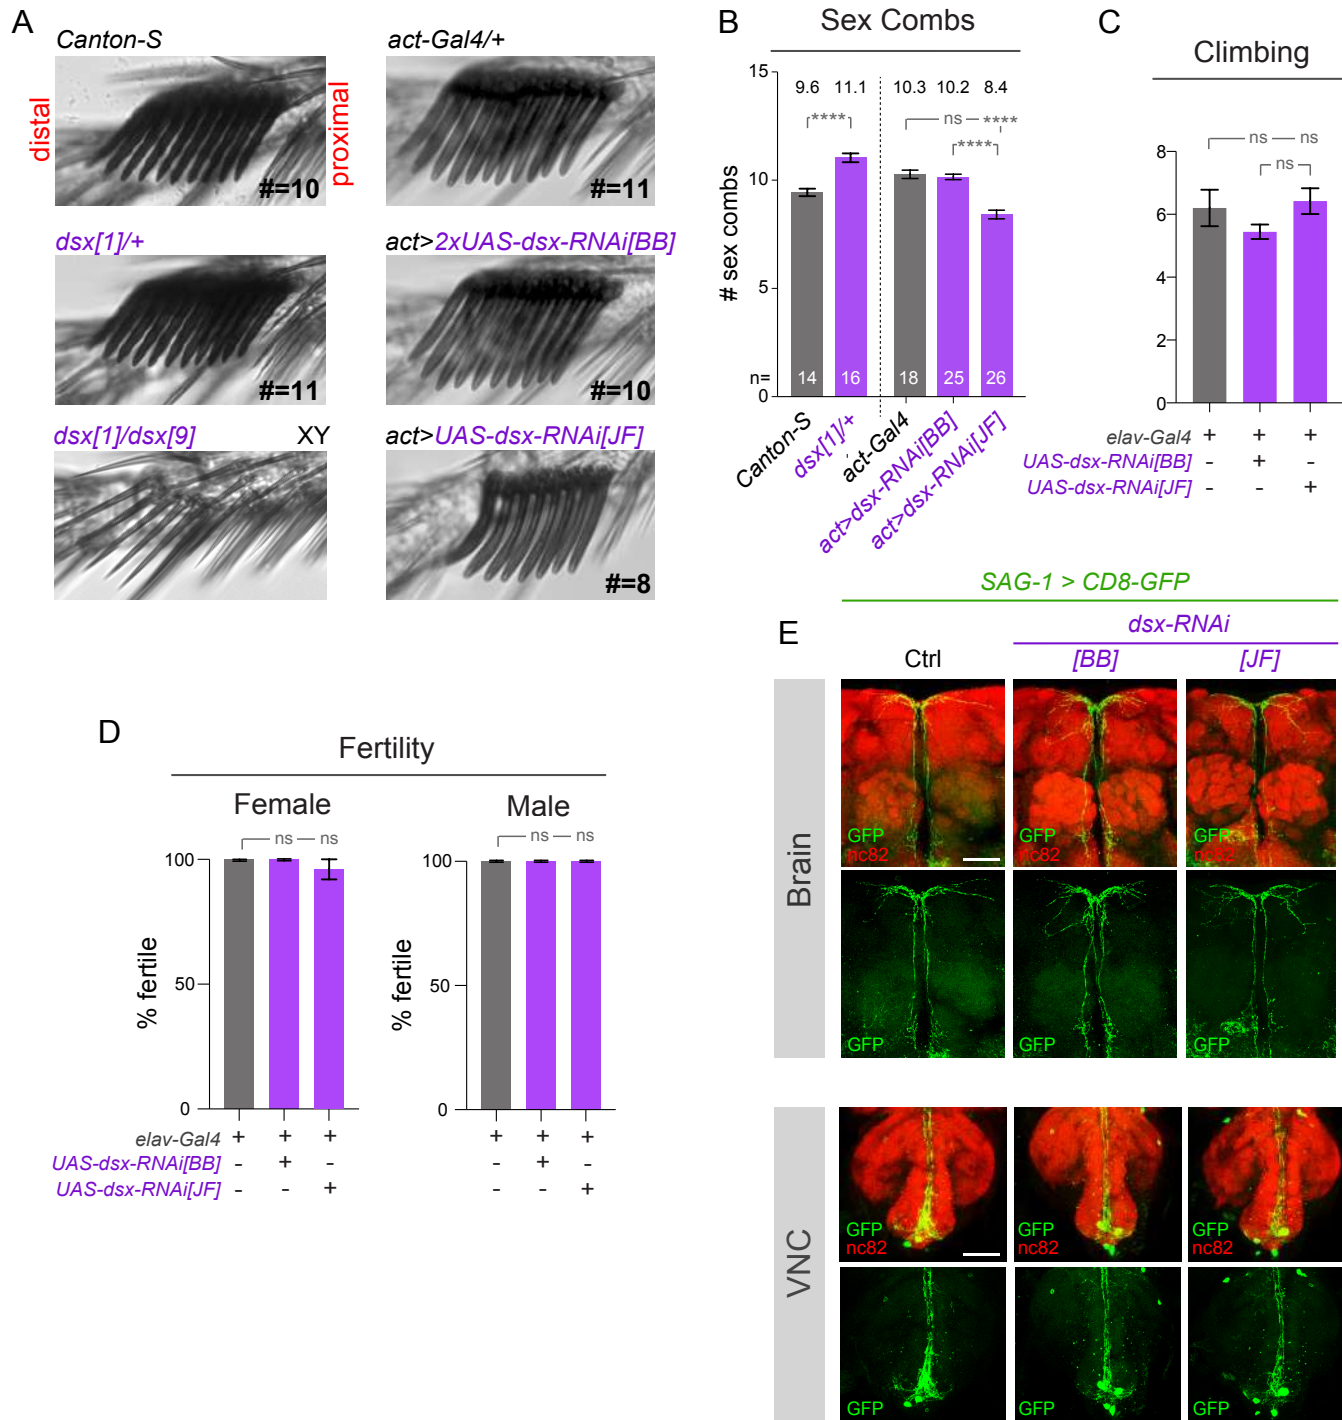

Supplementary Figure 5. Additional characterization of *doublesex* function. Related to Figures 3 and 4.

(A) Images show male sex combs on the first tarsal segment of the front leg (distal to the left, proximal to the right). Viable loss of function mutations of *dsx* result in complete loss of male features of the sex combs: thinner, less pigmented and reduced bristle numbers. Nonetheless, heterozygosity for *dsx* does not decrease male sex combs number or appearance. A published double *dsx-RNAi* transgene from Bruce Baker's lab ("BB") does not affect sex comb formation at 25°C, as reported, but expression of an RNAi transgene from the TRiP-JF collection mildly reduces their numbers. (B) Quantification of male sex comb numbers in controls, mutants, and knockdown genotypes, all at 25°C. (C, D) Behavioral analysis of locomotor ability and fertility, showing that Dsx levels do not affect these behaviors. (E) Images show abdominal SAG-1 lineages in wild-type controls (*Canton-S*) and the two *dsx* knockdown conditions. No gross anatomy defects were found in the number, location or dendrite arborization at the VNC nor in their axonal pattern in the brain. Mann-Whitney non parametric test (B,C) Fisher's exact test (D). ns, not significant, \*\*\*\**p* < 0.0001. Error bars, SEM. Scalebar 50  $\mu$ m.
